# Supplementary material
Source: publisher figshare collection journal article supplement (https://frontiersin.figshare.com/ndownloader/files/14520710)
Supplement: Supplementary file [file 14520710]

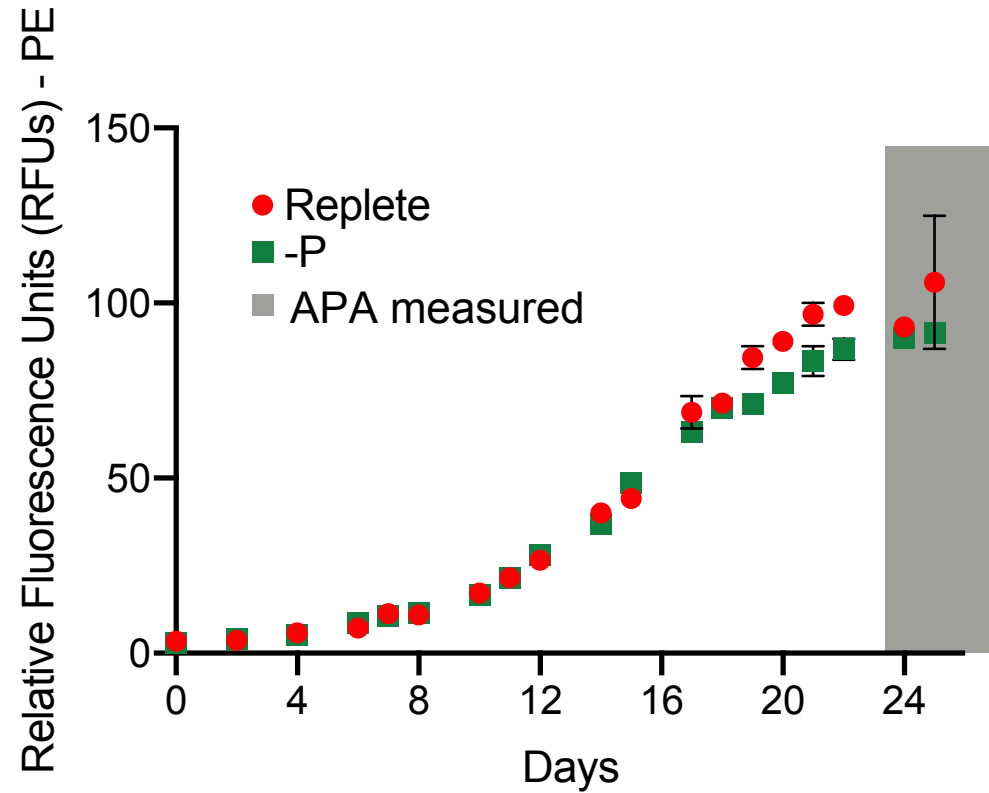

**Supplementary Figure 1.** Growth curves for phosphorus replete (+P) and phosphorus deficient cultures (-P) assayed with phycoerythrin (PE) fluorescence and plotted in relative fluorescence units. Over the exponential phase (days 6–17), the -P and +P growth rates were 0.19 and 0.2 d<sup>-1</sup>, respectively. The gray bar indicates when alkaline phosphatase activity (APA) was measured. Error bars represent standard error of the mean (SEM), where n = 3 for +P and n = 6 for -P.
